# Supplementary material for: Large scale synthesis of an amorphous polyester elastomer with tunable mechanoluminescence and preliminary application in optical strain sensing
Source: Royal Society of Chemistry journal article supplement (doi:10.1039/c7tc00433h), 2017-01-01
Supplement: c7tc00433h1.pdf [file c7tc00433h1.pdf]

## Electronic Supporting Information

### Large Scale Synthesis of Amorphous Polyester Elastomer with Tunable Mechanoluminescence and Preliminary Application in Optical Strain Sensing

Hongguo Shou <sup>a</sup>, Kun Jia <sup>a\*</sup>, Xin Zhou <sup>b</sup>, Lingqiang Gao <sup>b</sup>, Xiaohong He <sup>a</sup>, Xuefei Zhou <sup>a</sup>, Dawei Zhang <sup>a</sup>,

Xiaobo Liu <sup>a\*</sup>

<sup>a</sup> Research Branch of Advanced Functional Materials, High Temperature Resistant Polymer and Composites Key Laboratory of Sichuan Province, School of Microelectronics and Solid-State Electronics, University of Electronic Science and Technology of China, Chengdu, 610054, P. R. China

<sup>b</sup> Optical Materials Research Laboratory, Yibin Plastic Packing Materials Co. Ltd, Yibin 644007, China

\* Correspondence to: [jiakun@uestc.edu.cn](mailto:jiakun@uestc.edu.cn); [liuxb@uestc.edu.cn](mailto:liuxb@uestc.edu.cn)

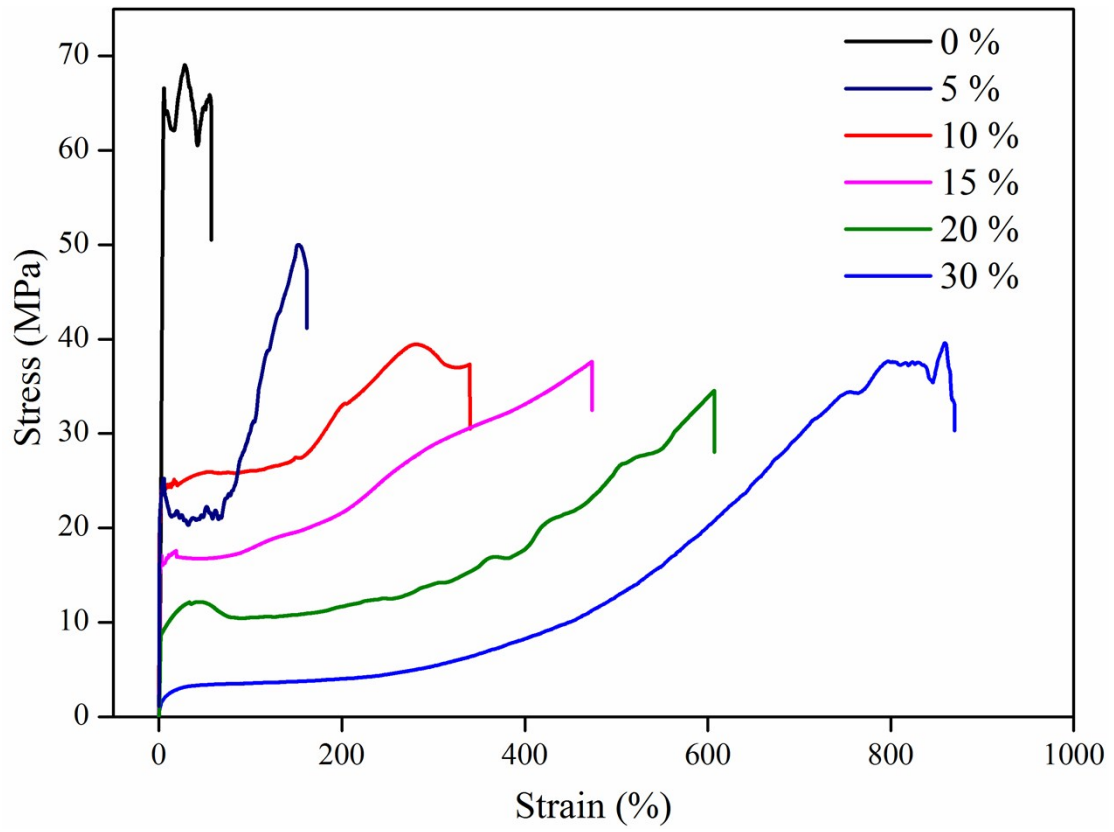

**Fig.S1** The stress-strain curves of PETG-PEG copolyesters

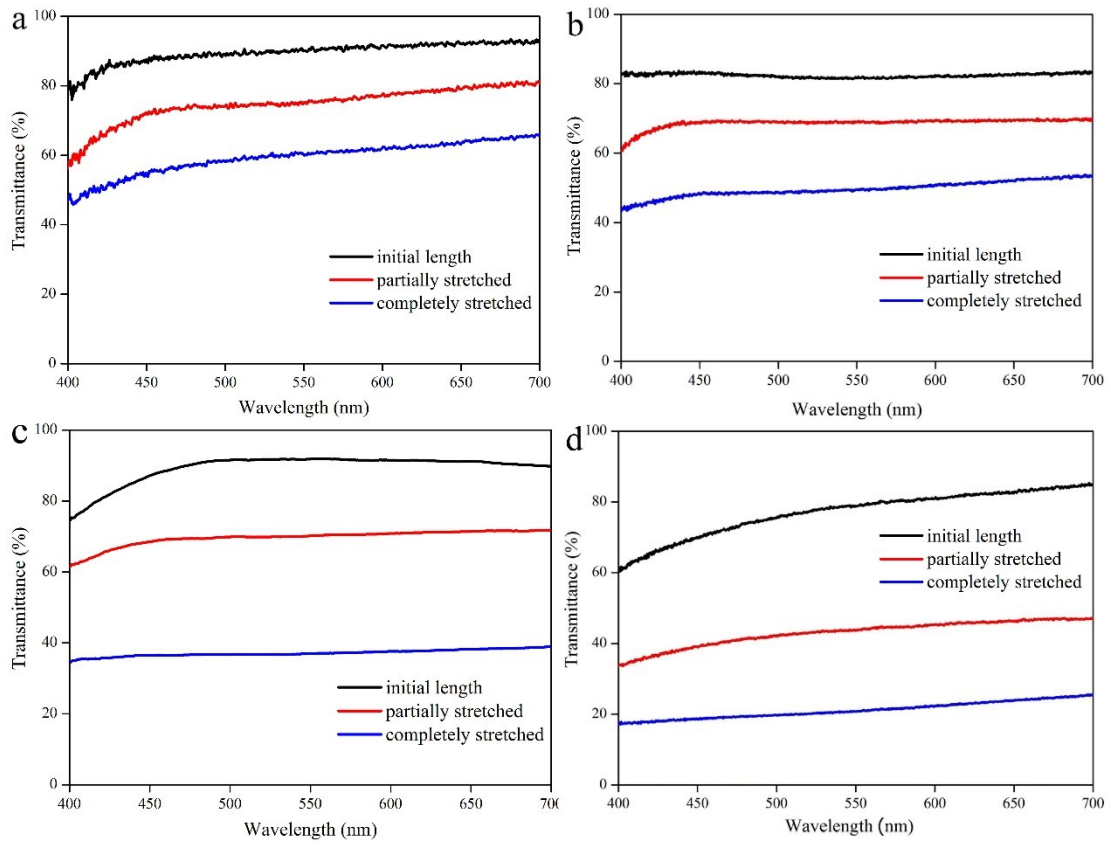

**Fig.S2** Transmission spectra of PETG-PEG copolyesters containing 5 wt.% (a), 15 wt.% (b) , 20 wt.% (c) and 30 wt.% (d) PEG

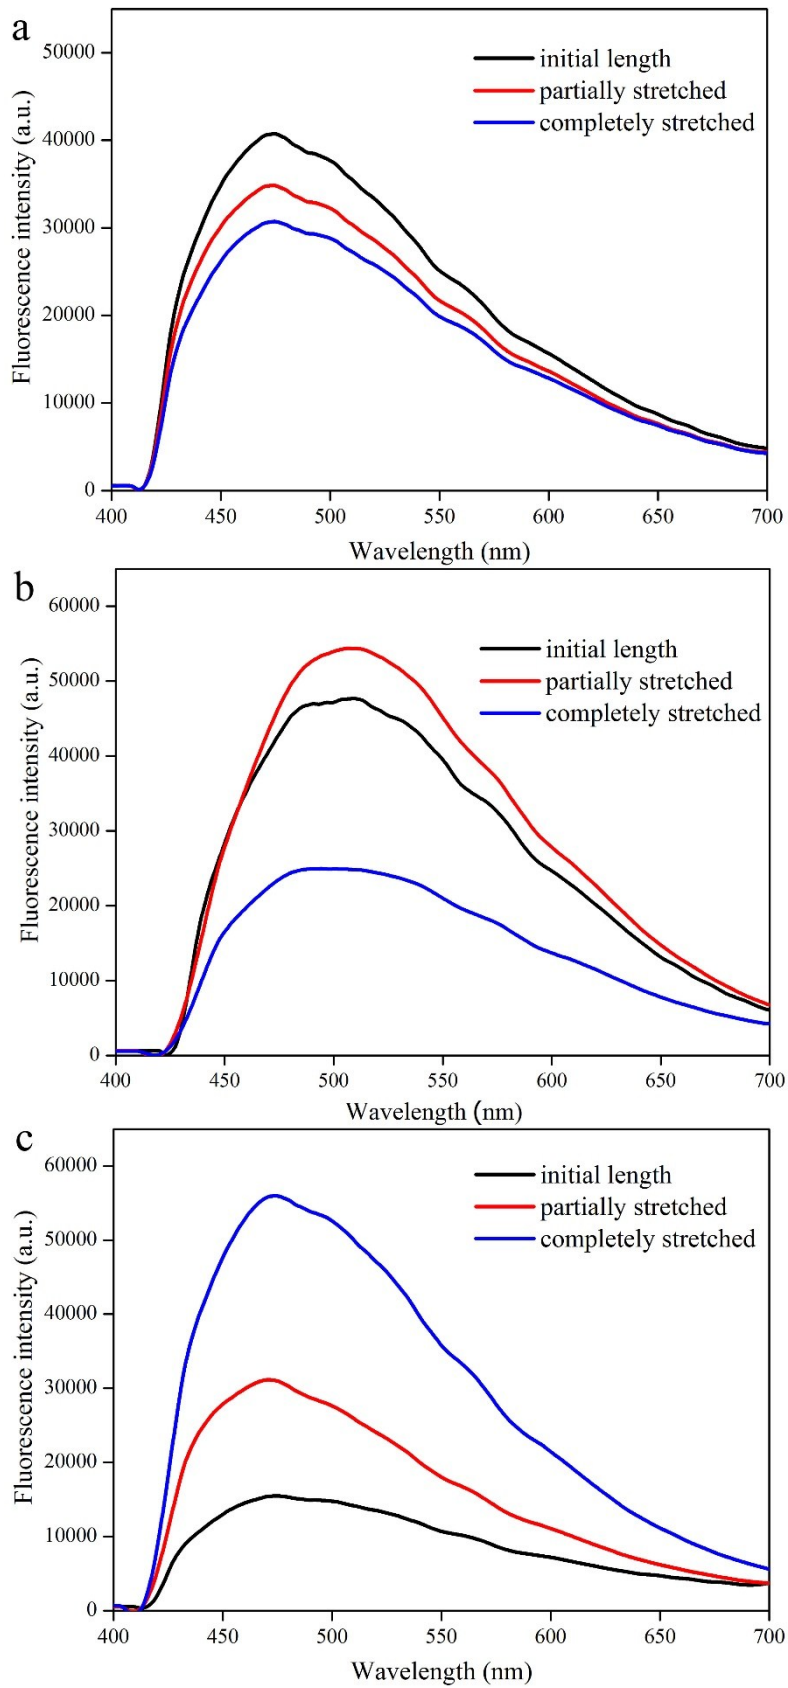

**Fig.S3** Fluorescence emission spectra of PETG-PEG copolyesters containing 5 wt.% (a), 15 wt.% (b) and 20 wt.% (c) PEG under laser excitation at 405 nm.

**Table.S1** Mechanical properties of PETG-PEG copolyesters

| Sample No. | Content of PEG (mass ratio) | Intrinsic Viscosity (dL/g) | Elongation at Break (%) | Tensile strength (MPa) |
|------------|-----------------------------|----------------------------|-------------------------|------------------------|
| 1          | 0 %                         | 0.65                       | 57.41                   | 69.04                  |
| 2          | 5 %                         | 0.66                       | 161.43                  | 49.99                  |
| 3          | 10 %                        | 0.68                       | 336.53                  | 39.45                  |
| 4          | 15 %                        | 0.70                       | 469.28                  | 37.63                  |
| 5          | 20 %                        | 0.71                       | 603.58                  | 35.20                  |
| 6          | 30 %                        | 0.72                       | 861.25                  | 37.36                  |
